# Supplementary material for: Ruthenium complexes bearing an unsymmetrical pincer ligand with a 2-hydroxypyridylmethylene fragment: active catalysts for transfer hydrogenation of ketones
Source: Royal Society of Chemistry journal article supplement (doi:10.1039/c6dt00034g), 2016-01-01
Supplement: c6dt00034g1.pdf [file c6dt00034g1.pdf]

*Electronic Supplementary Information for:*

**Ruthenium complexes bearing an unsymmetrical pincer ligand with  
a 2-hydroxypyridylmethylene fragment: active catalysts for transfer  
hydrogenation of ketones**

Jing Shi,<sup>a</sup> Bowen Hu,<sup>a</sup> Dawei Gong,<sup>a</sup> Shu Shang,<sup>a</sup> Guangfeng Hou<sup>c</sup> and Dafa Chen<sup>\*ab</sup>

<sup>a</sup> School of Chemical Engineering & Technology, Harbin Institute of Technology, Harbin 150001, P.R. China.

<sup>b</sup> State Key Laboratory of Elemento-organic Chemistry, Nankai University, Tianjin 300071, P.R. China.

<sup>c</sup> Key Laboratory of Functional Inorganic Material Chemistry (MOE); School of Chemistry and Materials Science, Heilongjiang University, Harbin 150080, P. R. China.

Table of Contents

|                             |    |
|-----------------------------|----|
| <sup>1</sup> H NMR spectra  | S2 |
| <sup>31</sup> P NMR spectra | S7 |
| <sup>13</sup> C NMR spectra | S9 |

# <sup>1</sup>H NMR Spectra

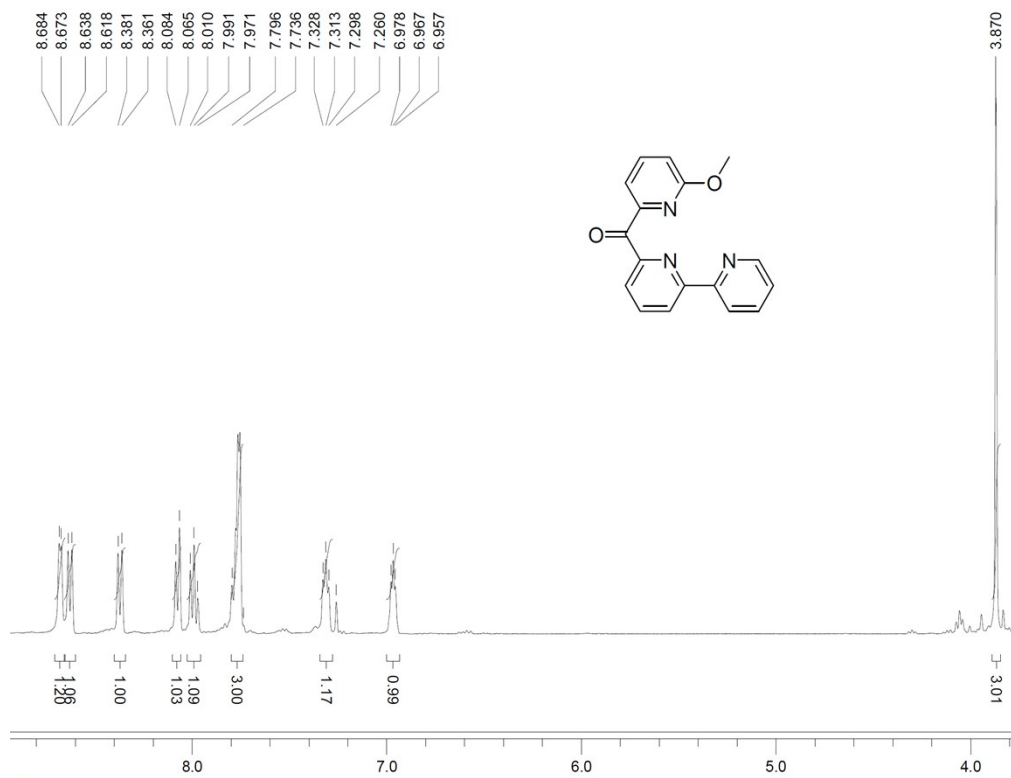

Figure S1. <sup>1</sup>H NMR spectrum of **B** in CDCl<sub>3</sub>.

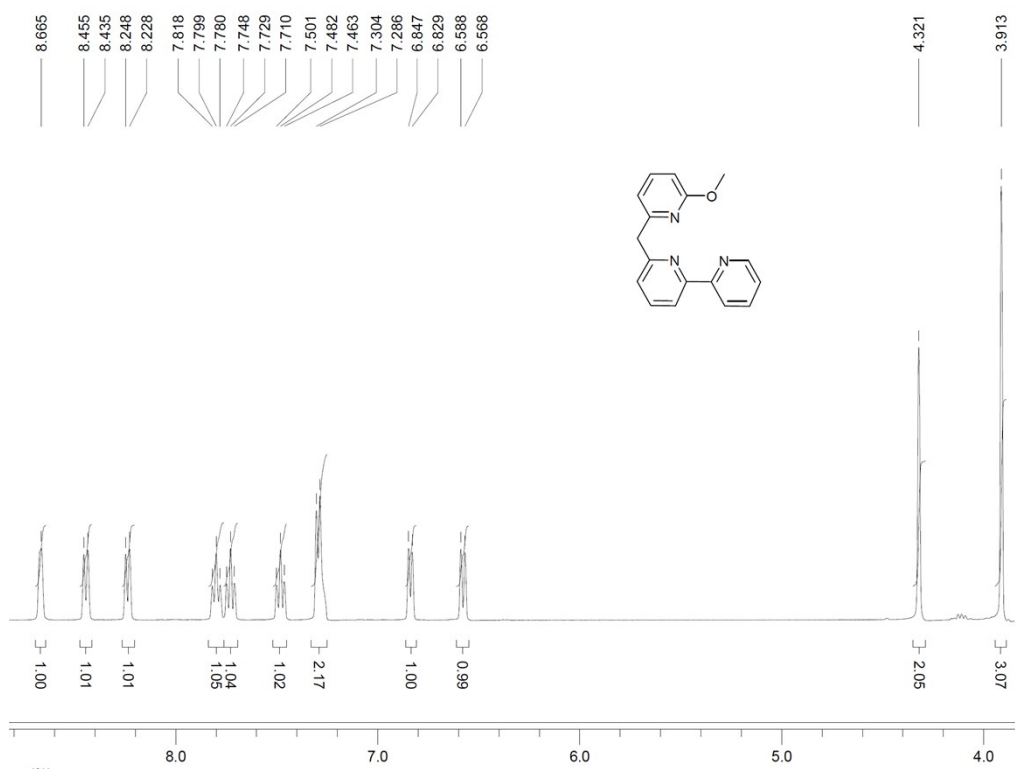

Figure S2. <sup>1</sup>H NMR spectrum of **1** in CDCl<sub>3</sub>.

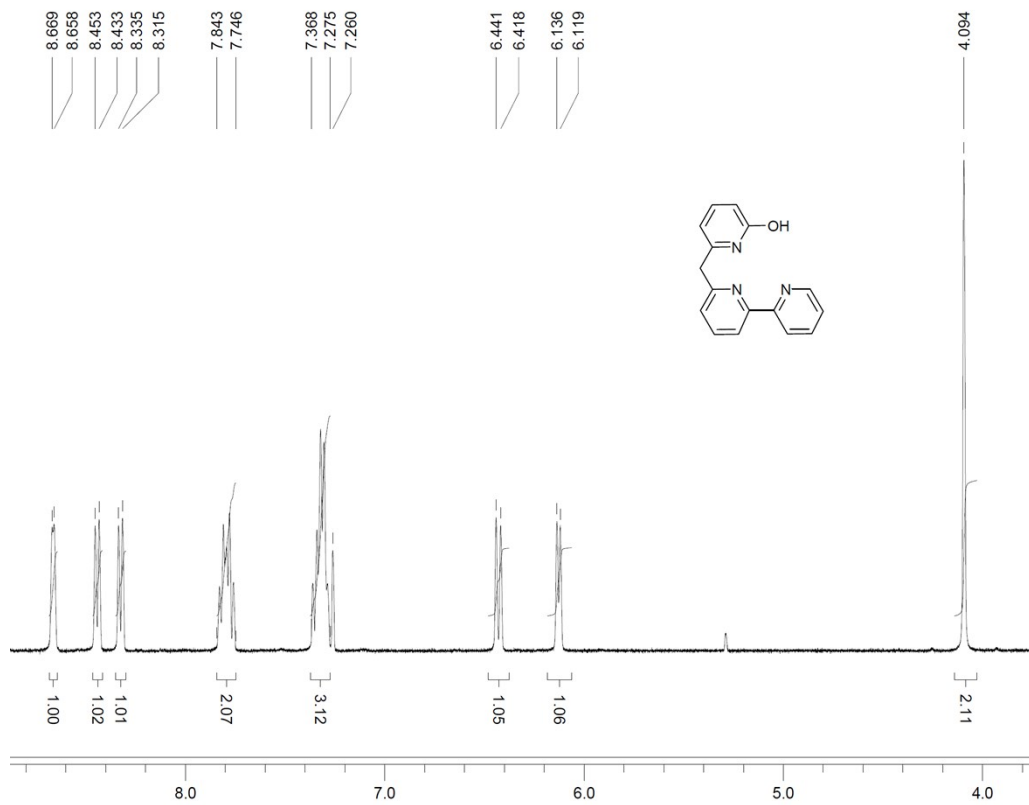

Figure S3.  $^1\text{H NMR}$  spectrum of **2** in  $\text{CDCl}_3$ .

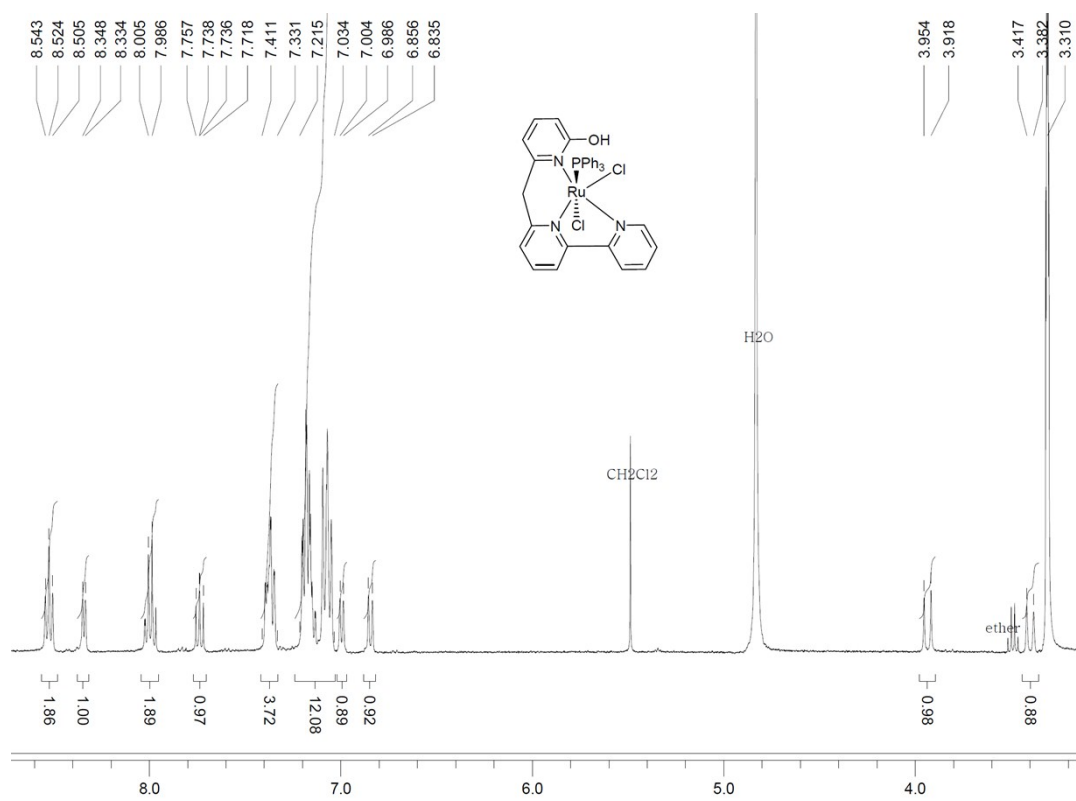

Figure S4.  $^1\text{H NMR}$  spectrum of **3** in  $\text{CD}_3\text{OD}$ .

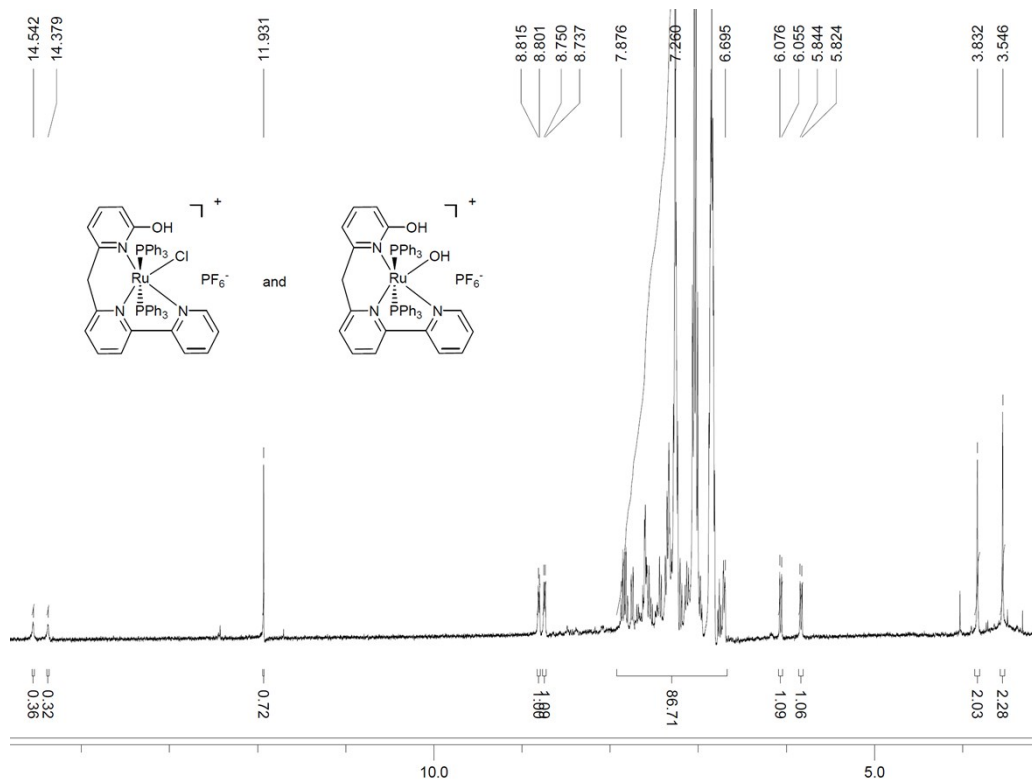

Figure S5. <sup>1</sup>H NMR spectrum of a mixture of **4** and **5** in CDCl<sub>3</sub>. (mol rate ≈ 1:1)

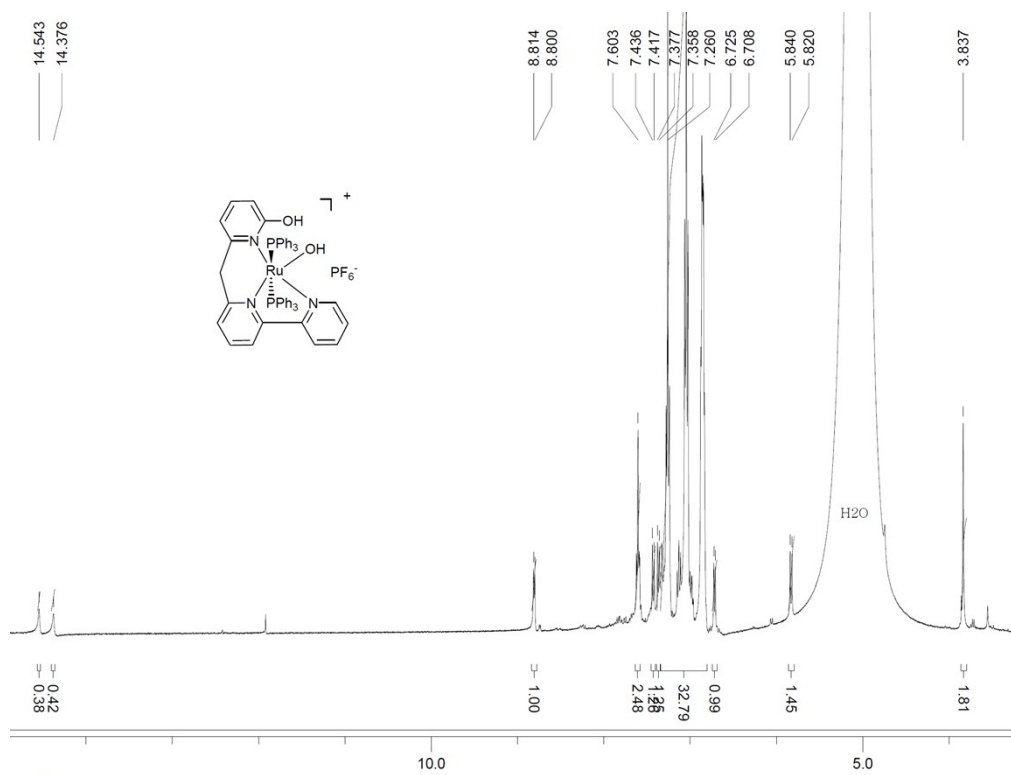

Figure S6. <sup>1</sup>H NMR spectrum of **5** in CDCl<sub>3</sub>.

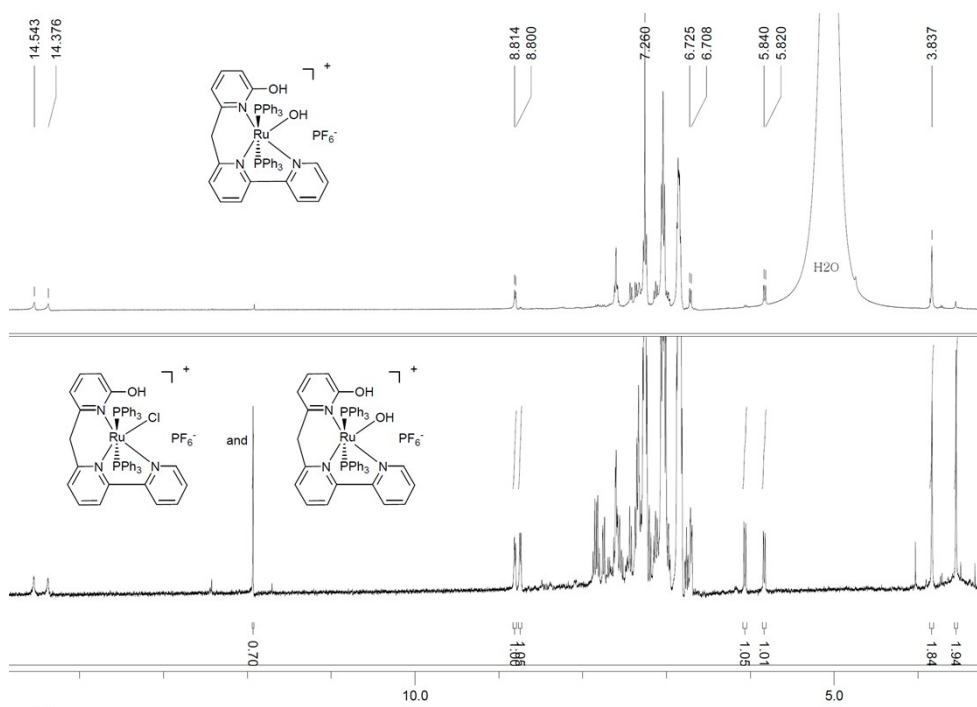

Figure S7. Comparison of  $^1\text{H}$  NMR spectra of **5** (top) with the mixture of **4** and **5** (bottom) in  $\text{CDCl}_3$ .

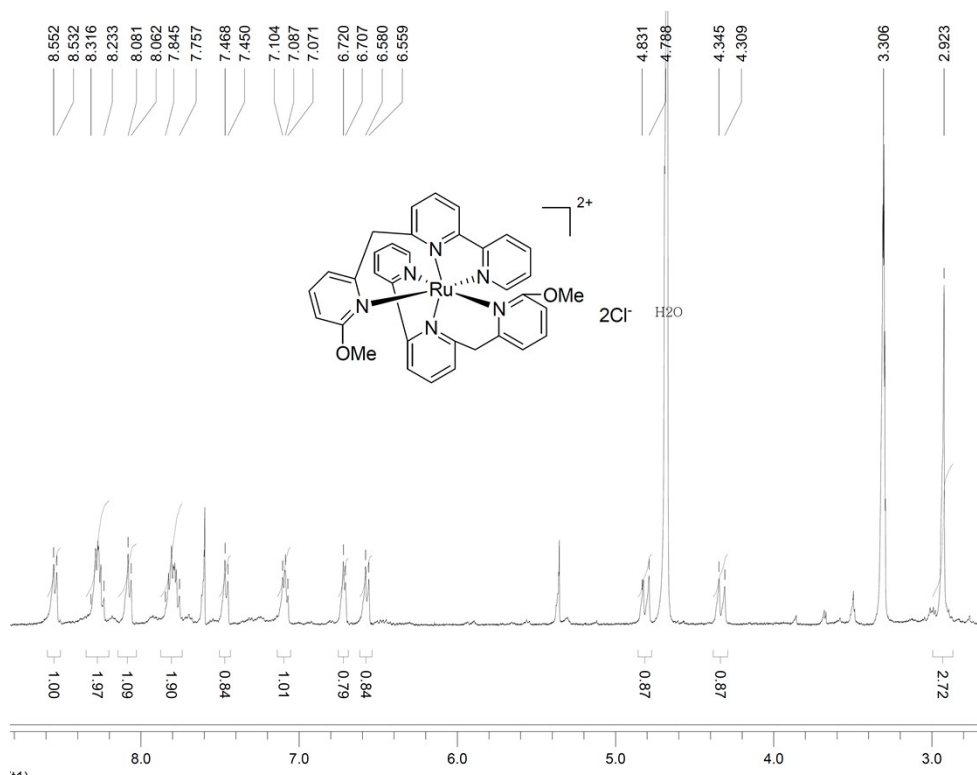

Figure S8.  $^1\text{H}$  NMR spectrum of **6** in  $\text{CD}_3\text{OD}$ .

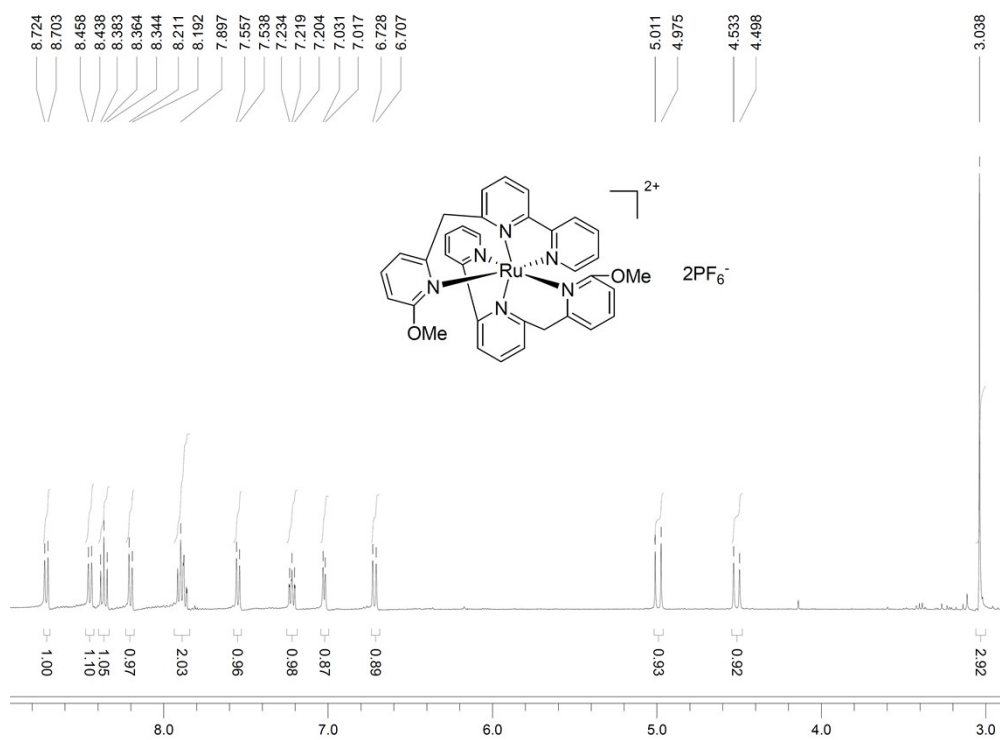

Figure S9. <sup>1</sup>H NMR spectrum of **7** in CD<sub>3</sub>COCD<sub>3</sub>.

### $^{31}\text{P}$ NMR spectra

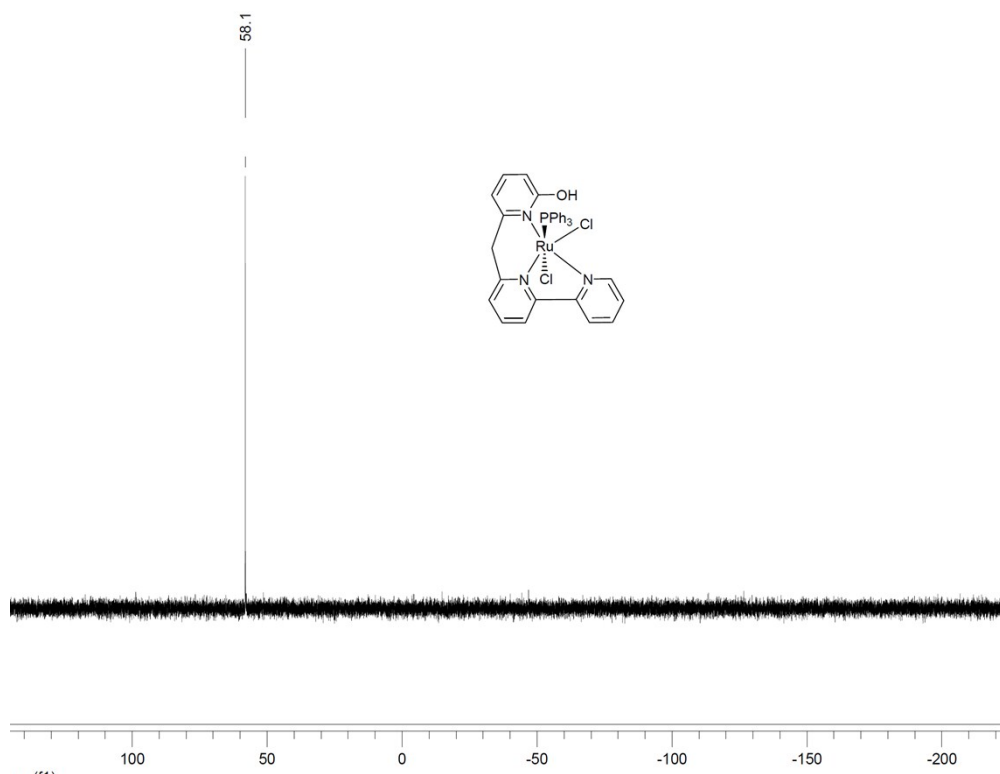

Figure S10.  $^{31}\text{P}$  NMR spectrum of **3** in  $\text{CD}_3\text{OD}$ .

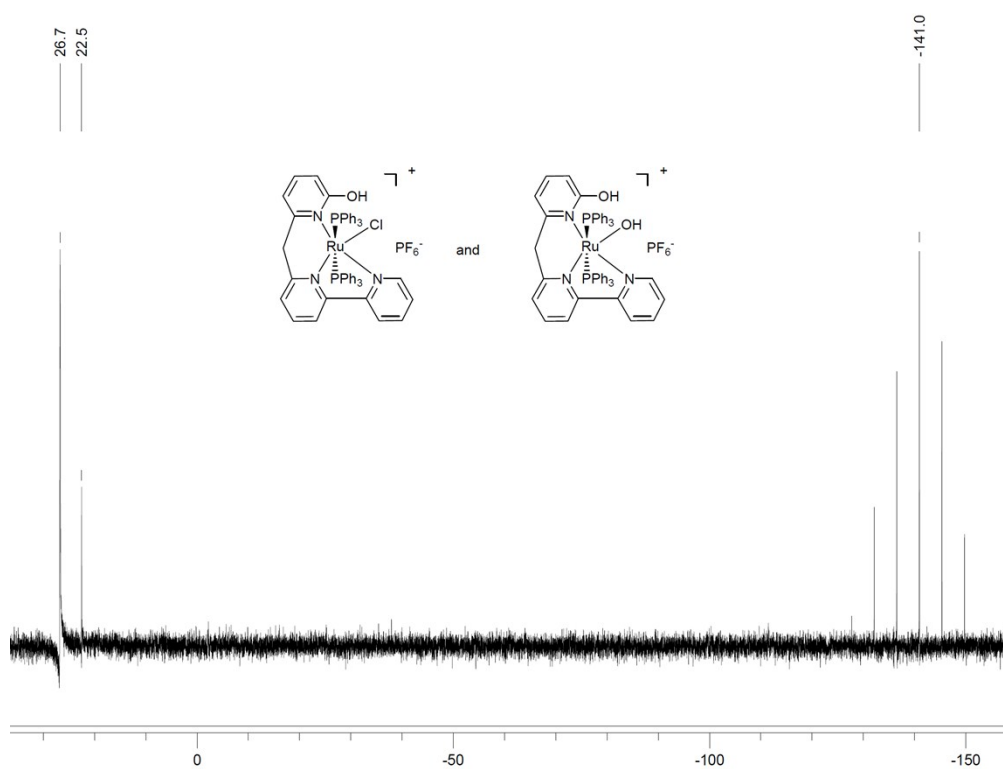

Figure S11.  $^{31}\text{P}$  NMR spectrum of a mixture of **4** and **5** in  $\text{CDCl}_3$ .

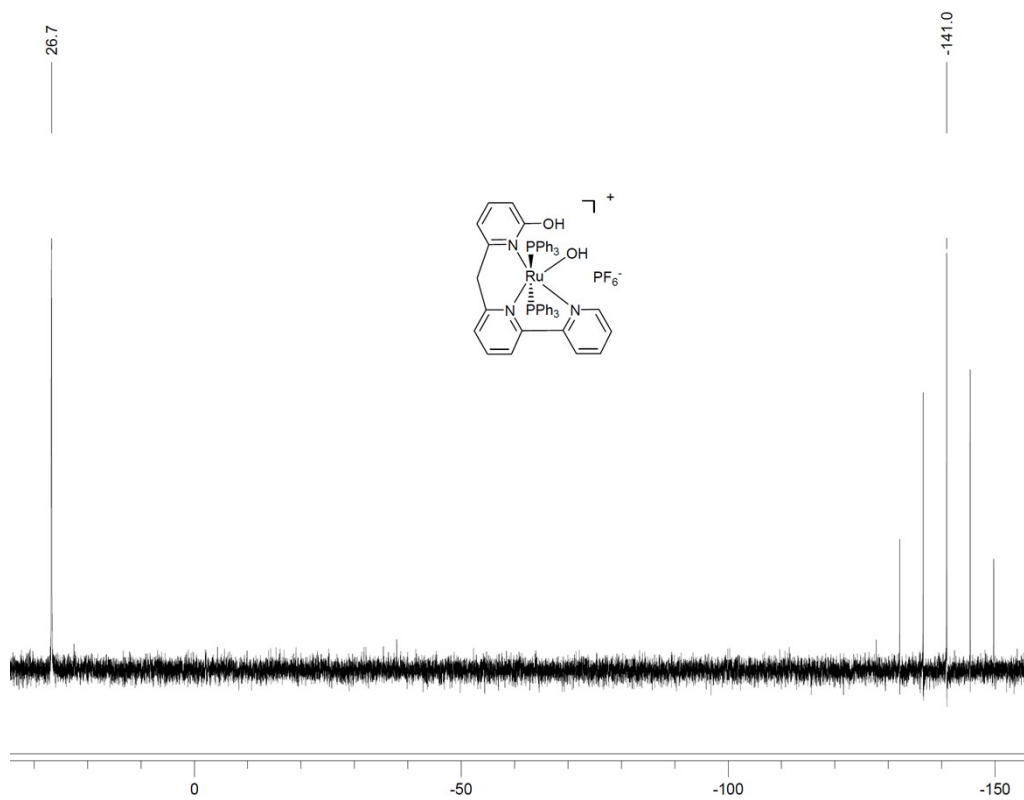

Figure S12.  $^{31}\text{P}$  NMR spectrum of **5** in  $\text{CDCl}_3$ .



# <sup>13</sup>C NMR Spectra

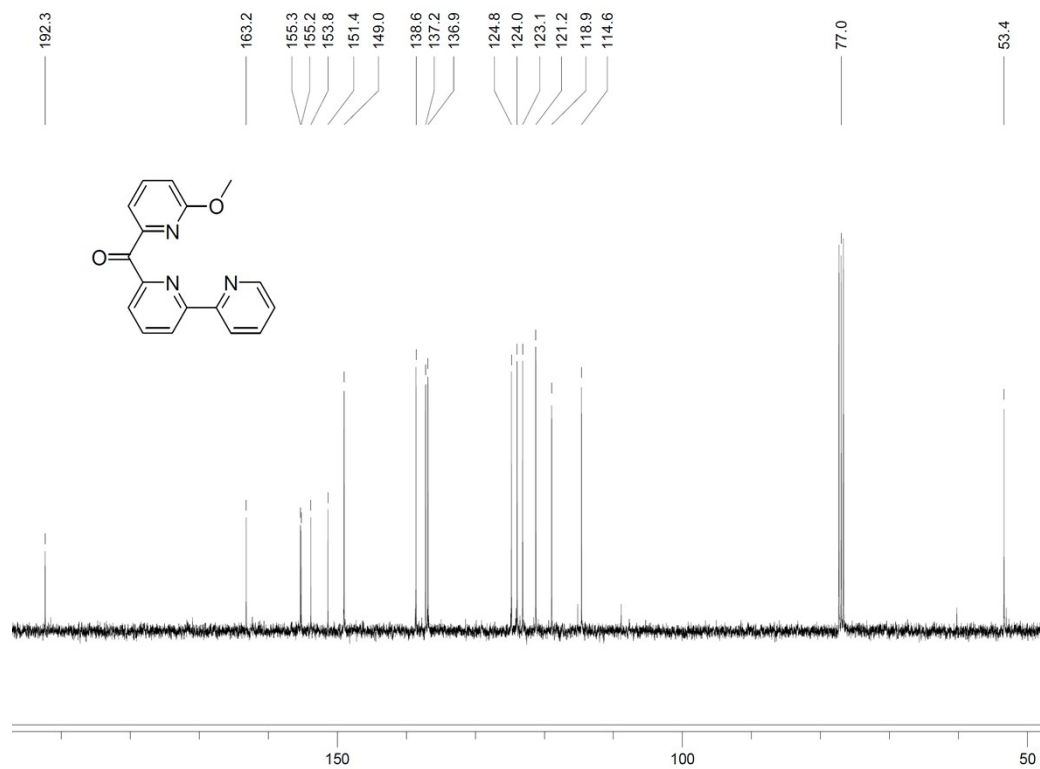

Figure S13. <sup>13</sup>C NMR spectrum of **B** in CDCl<sub>3</sub>

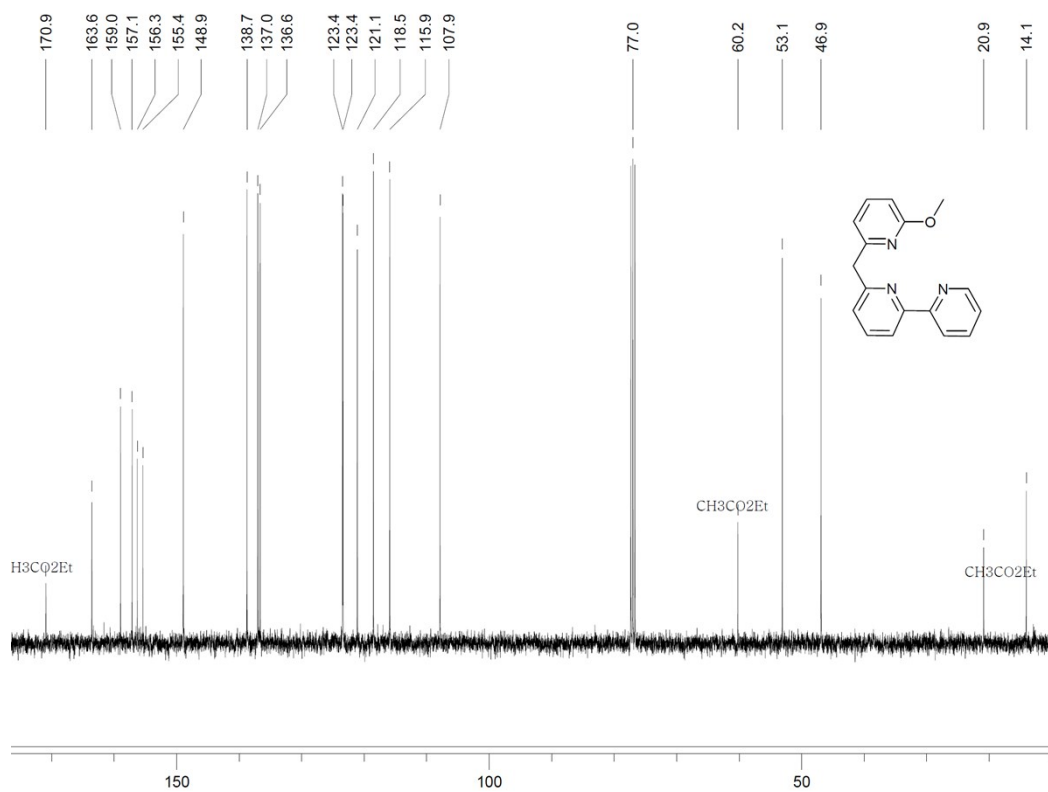

Figure S14. <sup>13</sup>C NMR spectrum of **1** in CDCl<sub>3</sub>

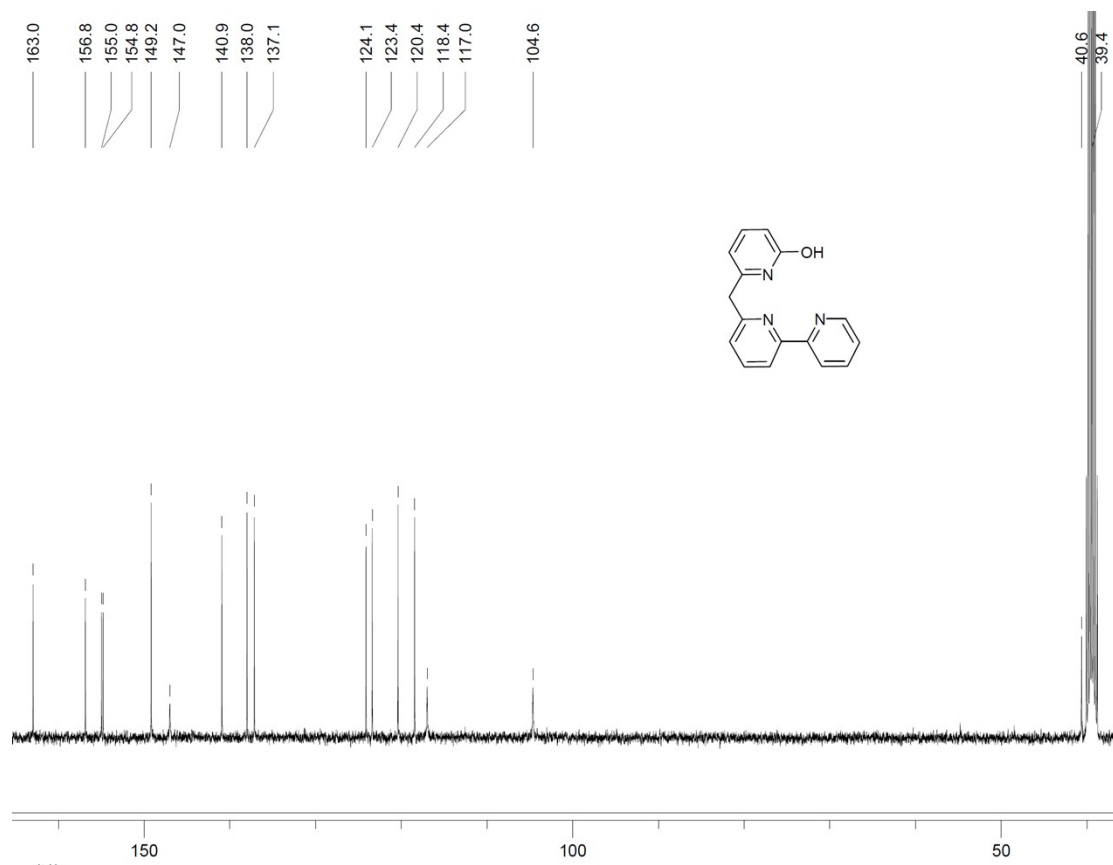

Figure S15.  $^{13}\text{C}$  NMR spectrum of **2** in DMSO
